# Supplementary material for: Effect of twisted molecular geometry on the solid-state emissions of an anthracene fluorophore
Source: Royal Society of Chemistry journal article supplement (doi:10.1039/d3ce00481c), 2023-01-01
Supplement: d3ce00481c1.pdf [file d3ce00481c1.pdf]

Electronic Supporting Information for

## Effect of twisted molecular geometry on the solid-state emissions of an anthracene fluorophore

G. Gogoi and R. J. Sarma\*

Department of Chemistry, Gauhati University, Guwahati, 781014 Assam, India

E-mail: [rjs@gauhati.ac.in](mailto:rjs@gauhati.ac.in), [rupam.sarma@gmail.com](mailto:rupam.sarma@gmail.com)

### Table of Contents

|    |                                                                                                                                                  |     |
|----|--------------------------------------------------------------------------------------------------------------------------------------------------|-----|
| 1  | General information and methods.....                                                                                                             | P2  |
| 2  | Details of synthesis, characterization of <b>A-4OH</b> and crystal formation procedure (Scheme S1) .....                                         | P2  |
| 3  | <sup>1</sup> H/ <sup>13</sup> C NMR spectra of <b>A-4OH</b> (Figures S1, S2) .....                                                               | P3  |
| 4  | ES mass spectrum of <b>A-4OH</b> (Figure S3).....                                                                                                | P4  |
| 5  | Solvent dependent UV-vis and fluorescence spectra of <b>A-4OH</b> (Figure S4) .....                                                              | P4  |
| 6  | Relative orientations of the anthracene and the hydroxy phenyl group in <b>A-4OH-NE</b> , <b>A-4OH-O</b> and <b>A-4OH-G</b> (Figure S5).....     | P4  |
| 7  | Side view and top view stacking structures of <b>A-4OH-G</b> , <b>A-4OH-O</b> and <b>A-4OH-NE</b> (Figure S6).....                               | P5  |
| 8  | Packing structures showing aromatic $\pi$ - $\pi$ interactions of <b>A-4OH-G</b> , <b>A-4OH-O</b> and <b>A-4OH-NE</b> (Figure S7).....           | P6  |
| 9  | Solid state UV-vis and fluorescence spectra of <b>A-4OH-NE</b> , <b>A-4OH-O</b> , <b>A-4OH-G</b> and pristine form (Figure S8).....              | P6  |
| 10 | Overlay of the FT-IR spectra of <b>A-4OH-Pristine</b> , <b>A-4OH-NE</b> , <b>A-4OH-O</b> and <b>A-4OH-G</b> (Figure S9) .....                    | P7  |
| 11 | Simulated and experimental powder XRD patterns and TGA graph of <b>A-4OH-NE</b> , <b>A-4OH-O</b> and <b>A-4OH-G</b> (Figure S10) .....           | P7  |
| 12 | Solid state UV-visible and Fluorescence spectra of <b>A-4OH-NE</b> before and after heating process (Figure S11) .....                           | P8  |
| 13 | FTIR spectra of <b>A-4OH-NE</b> before and after heating process (Figure S12).....                                                               | P8  |
| 14 | Time resolved photoluminescence spectra of <b>A-4OH-NE</b> , <b>A-4OH-NE-heated</b> (Figure S13)..                                               | P9  |
| 15 | Time resolved photoluminescence spectra of <b>A-4OH-G</b> , <b>A-4OH-O</b> and pristine form (Figure S14) .....                                  | P9  |
| 16 | Average fluorescence lifetime of <b>A-4OH-NE</b> , <b>A-4OH-NE-heated</b> , <b>A-4OH-O</b> , <b>A-4OH-G</b> and pristine form (Table S1).....    | P10 |
| 17 | HOMO-LUMO energy diagram of <b>A-4OH</b> molecule, <b>A-4OH-NE</b> , <b>A-4OH-O</b> and <b>A-4OH-G</b> using DFT (B3LYP/6-31G) (Figure S15)..... | P10 |
| 18 | Crystallographic data and refinement parameters for <b>A-4OH-NE</b> , <b>A-4OH-O</b> and <b>A-4OH-G</b> (Table S2) .....                         | P11 |

## 1. General experimental techniques.

All chemicals were commercially available from Sigma-Aldrich or Merck (India) and used as received. Solvents for spectroscopic experiments were distilled under nitrogen atmosphere before use. All  $^1\text{H}$  and  $^{13}\text{C}$  NMR were measured on a 300 MHz Bruker spectrometer, and reported in  $\delta/\text{ppm}$ . The absorption spectra were recorded on a Shimadzu UV-vis spectrophotometer (Model UV-1800), and fluorescence spectra were recorded using a Hitachi F2500 fluorimeter

## 2. Synthetic Procedures

**Synthesis of A-4OH:** Compound **A-4OH** was synthesized by reacting anthracene-9-aldehyde with 4-hydroxybenzohydrazide, according to Scheme 1:

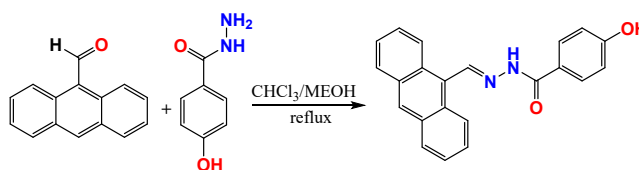

Scheme 1: Synthesis of **A-4OH**

**Synthesis of ligand A-4OH.** To a solution of anthracene-9-aldehyde (0.206 g, 1.0 mmol) in chloroform (5 mL), was added 4-benzoylhydrazide (0.242 g, 1.0 mmol) in methanol (5 mL) and the mixture was stirred at 80°C for 8 h. When the reaction was complete, the reaction mixture was concentrated under vacuum and desired compound precipitated out. This residue was rinsed with methanol (5 mL) to afford a yellow-coloured product **A-4OH**. Yield ~ 84%;  $^1\text{H}$  NMR (300 MHz, DMSO- $d_6$ )  $\delta_{\text{H}}$  11.95 (1H, s, amide NH), 10.33 (1H, s, -OH), 9.60 (1H, s, N=CH), 8.74 (1H, s, Ar-H), 8.71-8.69 (2H, d, Ar-H), 8.14-8.12 (2H, d, Ar-H), 7.92-7.89 (2H, d, Ar-H), 7.64-7.56 (4H, m, Ar-H), 6.93-6.90 (2H, d, Ar-H).  $^{13}\text{C}$  NMR (75 MHz, DMSO- $d_6$ ) 162.50, 160.57, 145.90, 130.76, 129.60, 129.40, 128.86, 127.02, 125.45, 125.09, 124.76, 123.63, 114.99. ES-MS:  $m/z$  341.13 calc. for (M+H<sup>+</sup>).

### Crystal formation procedure

**A-4OH-G:** Approximately 0.5 mg of **A-4OH** were taken in a glass vial and dissolved in 200  $\mu\text{L}$  THF. The glass vial was capped for slow evaporation of the solvent. After 2-3 weeks green emissive crystals were obtained.

**A-4OH-NE:** A very concentrated solution of **A-4OH** in distilled N,N-dimethyl formamide (1 mg/50  $\mu\text{L}$ ) was prepared and kept for crystallization on a watch glass. After 1 day block like crystals were obtained.

**A-4OH-O:** 3 mg of **A-4OH** were taken in a glass sample vial and dissolved in 1 mL Methanol and DMSO separately. After 1-2 week prism like orange emissive crystals were obtained.

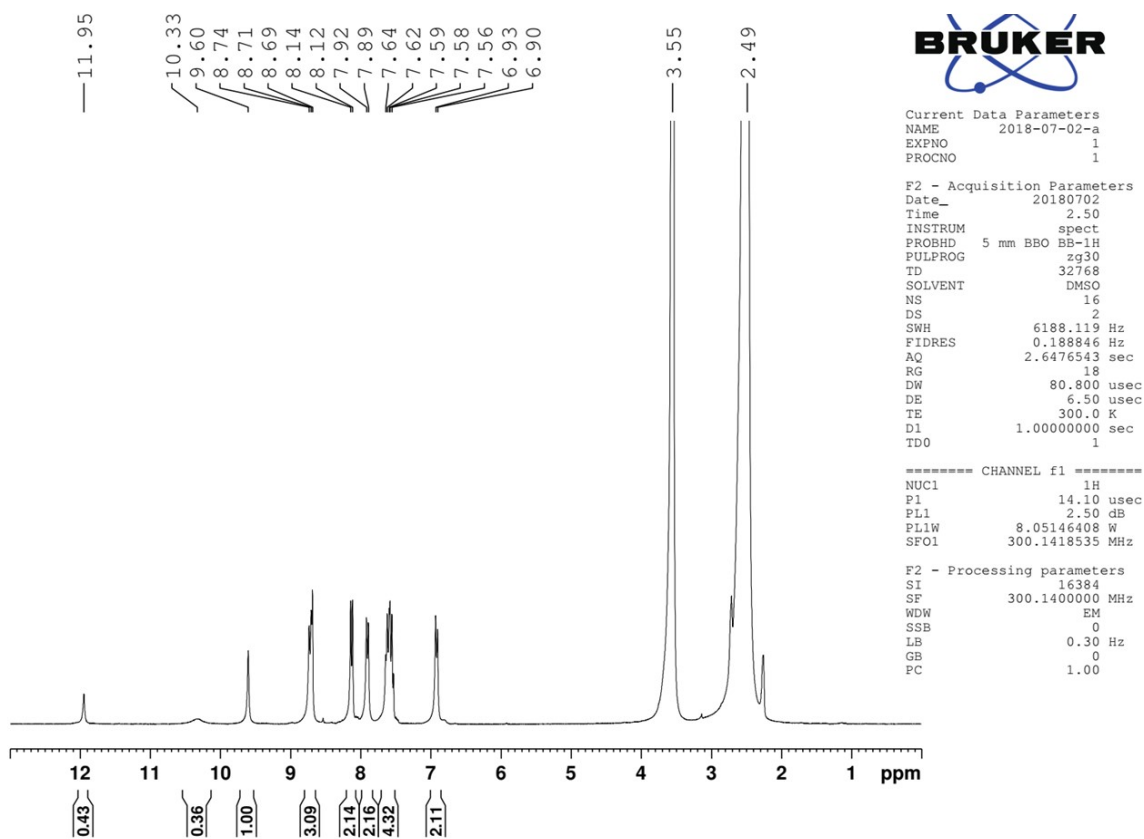

Figure S1:  $^1\text{H}$  NMR spectra of A-4OH in  $\text{DMSO-d}_6$

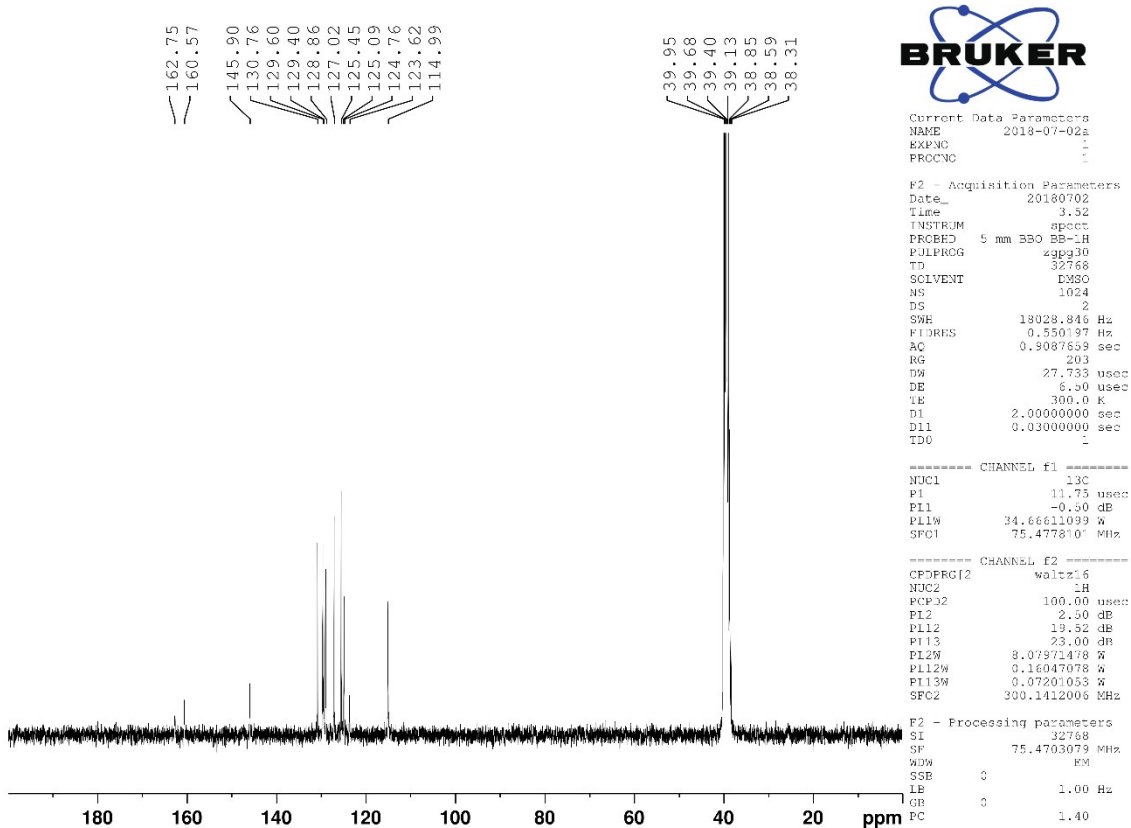

Figure S2:  $^{13}\text{C}$  NMR spectra of A-4OH in  $\text{DMSO-d}_6$

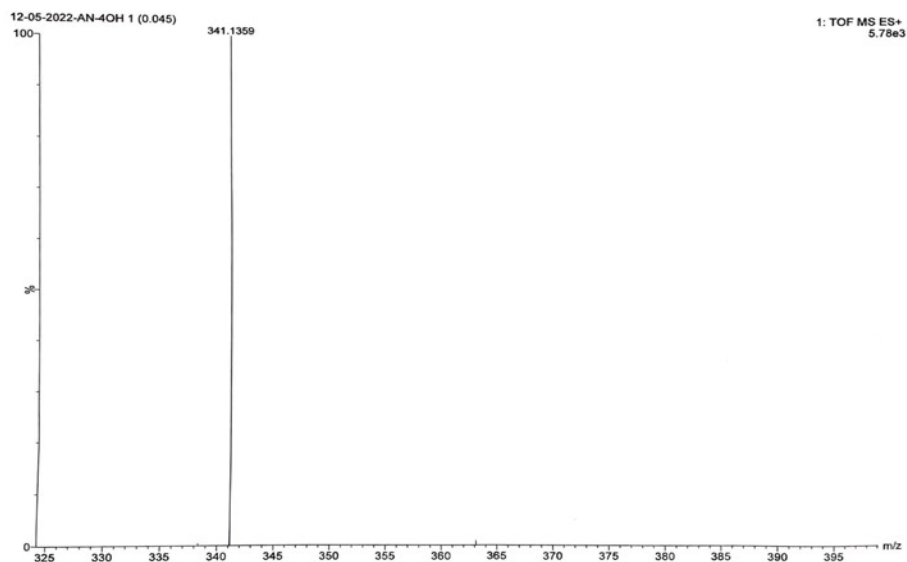

Figure S3: ES-MS spectra of **A-4OH**

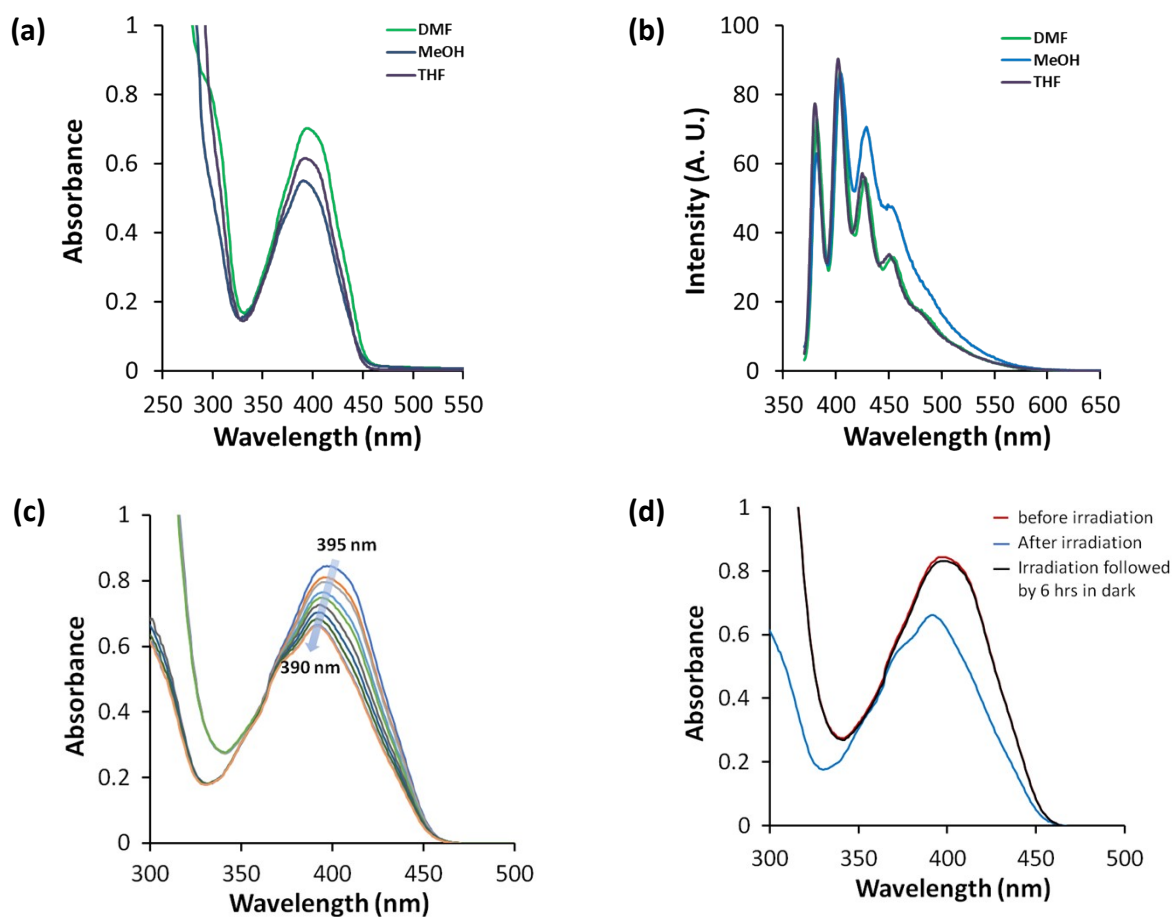

Figure S4: Solvent dependent (a) UV-vis, and (b) fluorescence spectra of **A-4OH** (conc. <0.1mM); (c) Changes in the UV-vis spectra of **A-4OH** in DMF arising from photochemical *trans-cis* isomerization following exposure to 365 nm UV-light (recorded at intervals of 1 min); (d) Thermal *cis-trans* isomerization which occurs spontaneously in the dark.

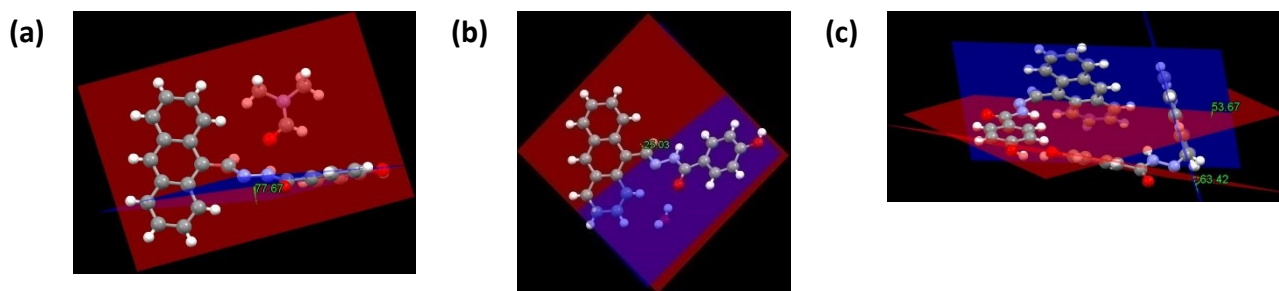

Figure S5: Relative orientations of the anthracene and the hydroxy phenyl group in (a) **A-4OH-NE**; (b) **A-4OH-O**; and (c) **A-4OH-G**.

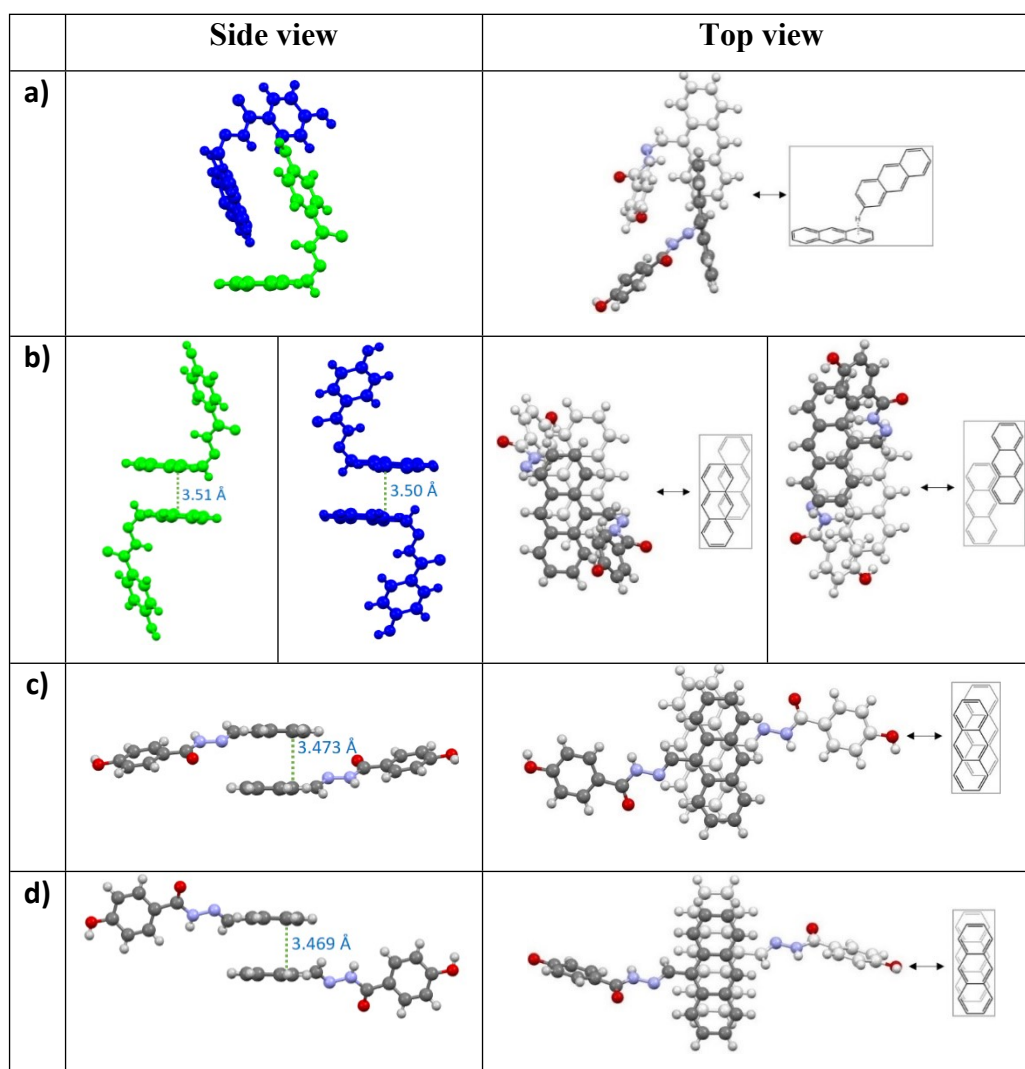

Figure S6: Side view and top view stacking structures of **A-4OH** crystals showing (a)  $\text{CH}-\pi$  interaction between two symmetric independent units of **A-4OH-G**, (b)  $\pi-\pi$  interaction between two symmetric related units of **A-4OH-G**, (c) and (d)  $\pi-\pi$  interaction between anthracene motifs of **A-4OH-O** and **A-4OH-NE** respectively; (inset: top view stacking mode of anthracene dimer)

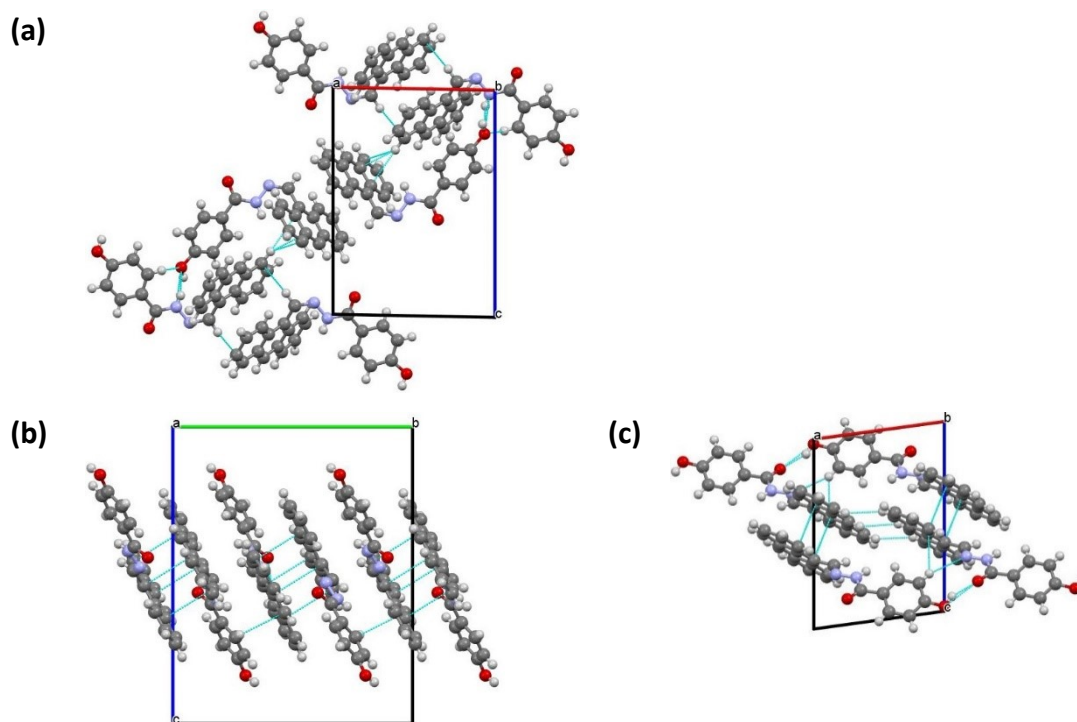

Figure S7: Packing structures showing aromatic  $\pi$ - $\pi$  interactions of (a) **A-4OH-G** along b-axis, (b) **A-4OH-O** along a-axis, and (c) **A-4OH-NE** along b-axis

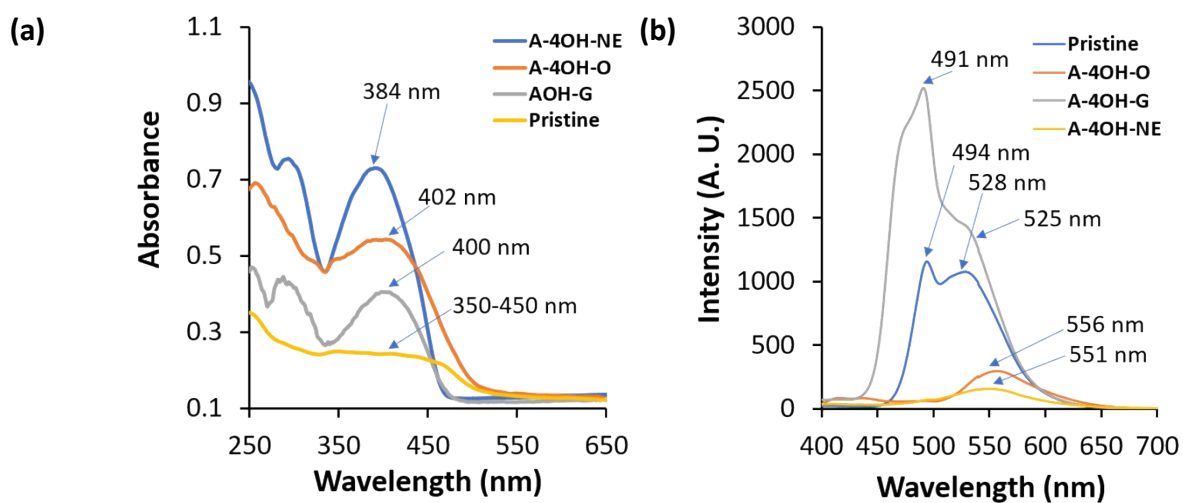

Figure S8: Solid state (a) UV-vis, and (b) fluorescence spectra of **A-4OH-NE**, **A-4OH-O**, **A-4OH-G** and pristine form

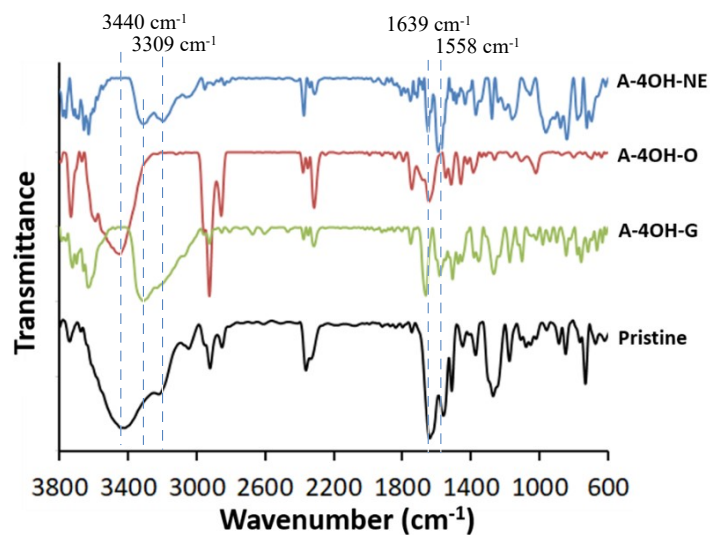

Figure S9: Overlay of the FT-IR spectra of pristine form, A-4OH-NE, A-4OH-O and A-4OH-G forms.

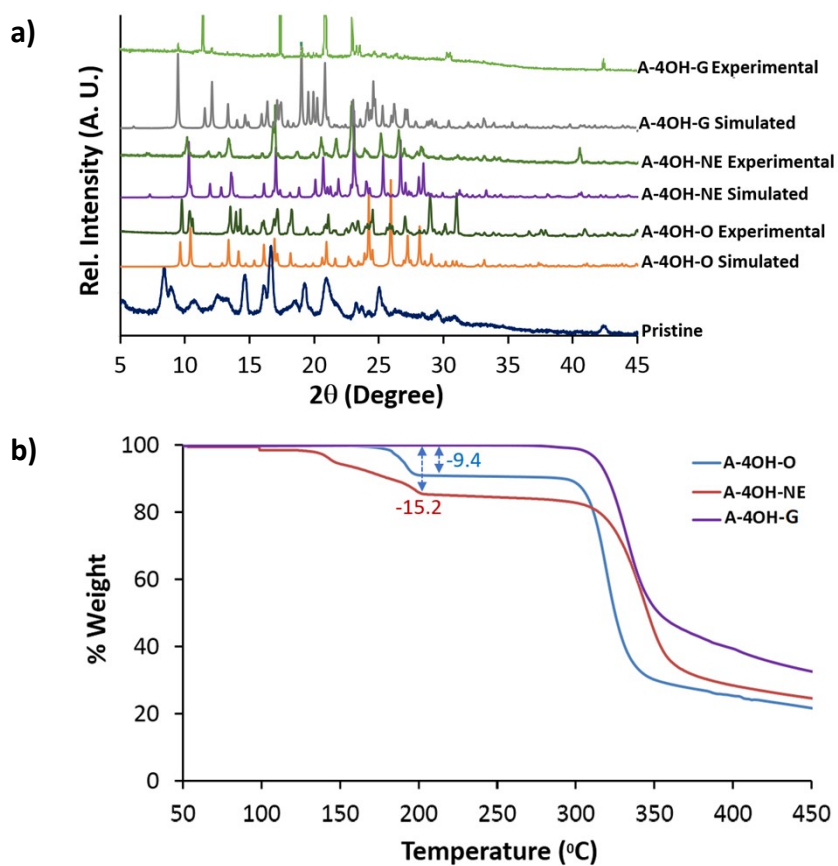

Figure S10: (a) Simulated and experimental powder XRD pattern of A-4OH-NE, A-4OH-O, A-4OH-G and Pristine form; (b) TGA graph of A-4OH-NE, A-4OH-O and A-4OH-G.

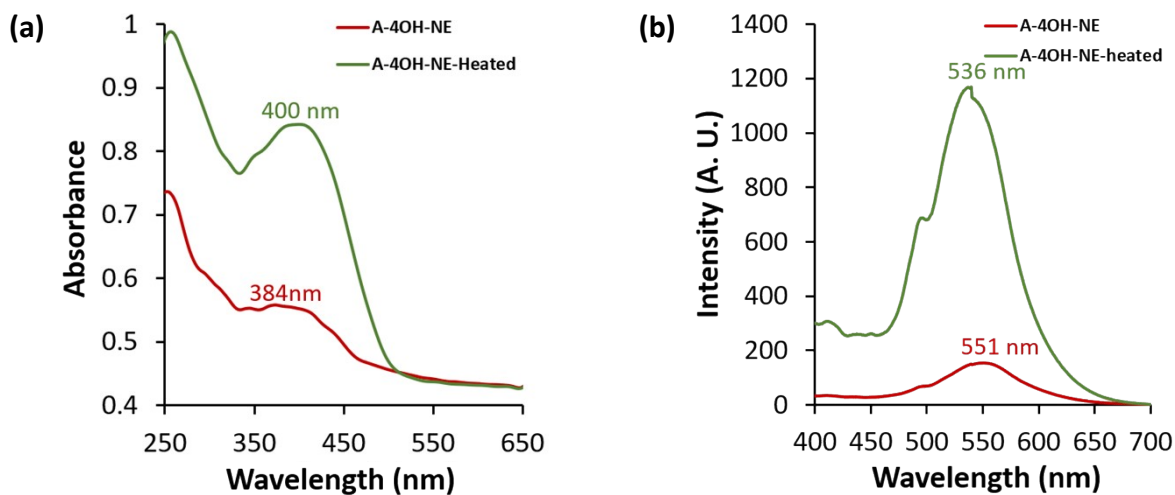

Figure S11: Solid state (a) UV-visible and (b) fluorescence spectra of **A-4OH-NE** before and after thermal stimulation.

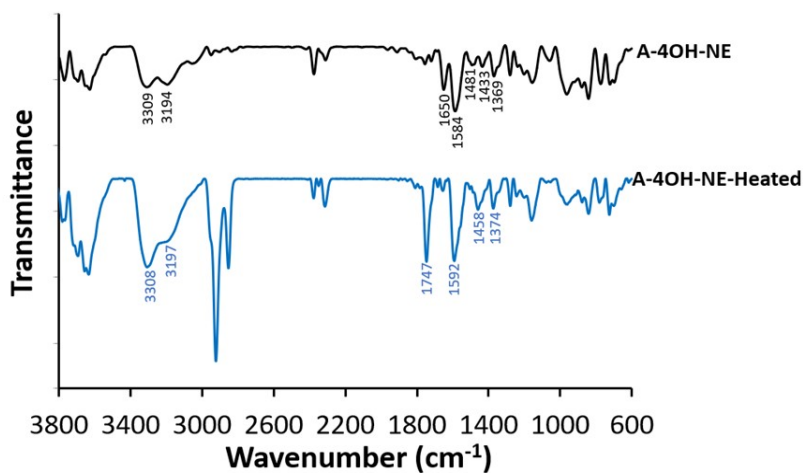

Figure S12: (a) Overlay of the (a) FTIR spectra and (b) thermogravimetric analysis of **A-4OH-NE** before and after thermal stimulation, viz. **A-4OH-F**.



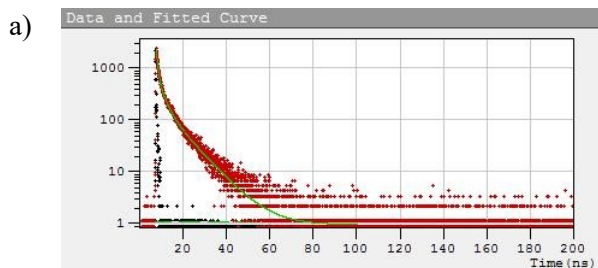

❖ Exponential Components Analysis (Reconvolution)

Fitting range : [140; 2050] channels  
 $\chi^2$  : 1.002

|   | $B_i$  | $\Delta B_i$ | $f_i$ (%) | $\Delta f_i$ (%) | $\tau_i$ (ns) | $\Delta \tau_i$ (ns) |
|---|--------|--------------|-----------|------------------|---------------|----------------------|
| 1 | 0.4997 | 0.0428       | 46.125    | 7.262            | 0.591         | 0.042                |
| 2 | 0.0620 | 0.0032       | 25.591    | 1.474            | 2.643         | 0.015                |
| 3 | 0.0193 | 0.0008       | 28.284    | 1.173            | 9.400         | 0.002                |

Shift : -0.694 ns ( $\pm$  1.002 ns)  
 Decay Background : 0.943 ( $\pm$  0.076 )  
 IRF background : 0

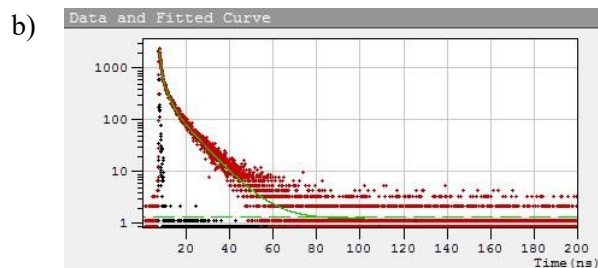

❖ Exponential Components Analysis (Reconvolution)

Fitting range : [139; 2100] channels  
 $\chi^2$  : 1.001

|   | $B_i$  | $\Delta B_i$ | $f_i$ (%) | $\Delta f_i$ (%) | $\tau_i$ (ns) | $\Delta \tau_i$ (ns) |
|---|--------|--------------|-----------|------------------|---------------|----------------------|
| 1 | 0.2306 | 0.0111       | 21.396    | 5.331            | 0.432         | 0.087                |
| 2 | 0.0615 | 0.0017       | 31.472    | 1.022            | 2.384         | 0.013                |
| 3 | 0.0229 | 0.0006       | 47.132    | 1.185            | 9.594         | 0.001                |

Shift : -0.098 ns ( $\pm$  0.860 ns)  
 Decay Background : 1.213 ( $\pm$  0.076 )  
 IRF background : 0

Figure S13: Time resolved photoluminescence spectra of (a) A-4OH-NE and (b) A-4OH-NE heated form

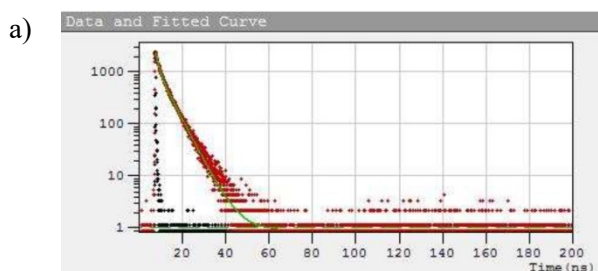

❖ Exponential Components Analysis (Reconvolution)

Fitting range : [139; 1300] channels  
 $\chi^2$  : 1.003

|   | $B_i$  | $\Delta B_i$ | $f_i$ (%) | $\Delta f_i$ (%) | $\tau_i$ (ns) | $\Delta \tau_i$ (ns) |
|---|--------|--------------|-----------|------------------|---------------|----------------------|
| 1 | 0.2287 | 0.0568       | 33.251    | 8.614            | 1.433         | 0.015                |
| 2 | 0.1200 | 0.0083       | 66.749    | 4.609            | 5.483         | 0.001                |

Shift : -1.074 ns ( $\pm$  7.766 ns)  
 Decay Background : 0.922 ( $\pm$  0.113 )  
 IRF background : 0

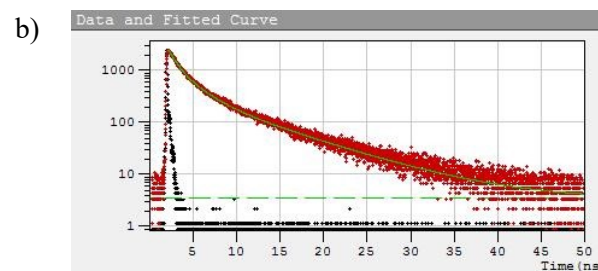

❖ Exponential Components Analysis (Reconvolution)

Fitting range : [154; 4096] channels  
 $\chi^2$  : 1.176

|   | $B_i$  | $\Delta B_i$ | $f_i$ (%) | $\Delta f_i$ (%) | $\tau_i$ (ns) | $\Delta \tau_i$ (ns) |
|---|--------|--------------|-----------|------------------|---------------|----------------------|
| 1 | 0.0538 | 0.0022       | 18.481    | 2.366            | 0.768         | 0.067                |
| 2 | 0.0376 | 0.0018       | 38.178    | 2.123            | 2.273         | 0.016                |
| 3 | 0.0122 | 0.0004       | 43.341    | 1.348            | 7.948         | 0.002                |

Shift : -0.103 ns ( $\pm$  2.207 ns)  
 Decay Background : 3.259 ( $\pm$  0.156 )  
 IRF background : 0.100

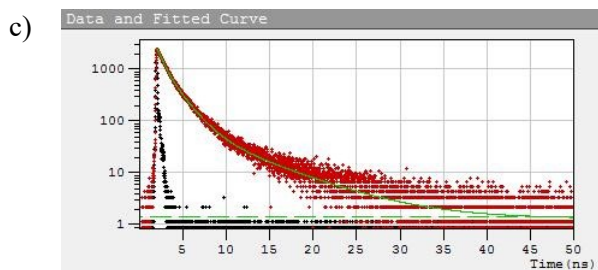

❖ Exponential Components Analysis (Reconvolution)

Fitting range : [147; 4096] channels  
 $\chi^2$  : 1.119

|   | $B_i$  | $\Delta B_i$ | $f_i$ (%) | $\Delta f_i$ (%) | $\tau_i$ (ns) | $\Delta \tau_i$ (ns) |
|---|--------|--------------|-----------|------------------|---------------|----------------------|
| 1 | 0.0507 | 0.0009       | 19.500    | 2.830            | 0.490         | 0.063                |
| 2 | 0.0482 | 0.0008       | 63.668    | 1.404            | 1.681         | 0.008                |
| 3 | 0.0033 | 0.0002       | 16.832    | 0.787            | 6.591         | 0.003                |

Shift : -0.049 ns ( $\pm$  0.870 ns)  
 Decay Background : 1.292 ( $\pm$  0.072 )  
 IRF background : 0.100

Figure S14: Time resolved luminescence spectra of (a) A-4OH-G, (b) A-4OH-O and (c) pristine form.

**Table S1.** Comparison of the average fluorescence lifetime of **A-4OH-NE**, **A-4OH-NE (heated)**, **A-4OH-O** and pristine sample

|                   | f1      | $\tau$ 1 | f2      | $\tau$ 2 | f3      | $\tau$ 3 | ns    |
|-------------------|---------|----------|---------|----------|---------|----------|-------|
| A-4OH-NE          | 0.46125 | 0.59     | 0.25598 | 2.643    | 0.28284 | 9.4      | 3.604 |
| A-4OH-NE (heated) | 0.21396 | 0.432    | 0.31472 | 2.384    | 0.47132 | 9.594    | 5.364 |
| A-4OH-O           | 0.18481 | 0.768    | 0.38178 | 2.273    | 0.43341 | 7.948    | 4.454 |
| A-4OH-G           | 0.33251 | 1.433    | 0.66749 | 5.483    |         |          | 4.136 |
| Pristine          | 0.195   | 0.49     | 0.63668 | 1.681    | 0.16832 | 6.591    | 2.275 |

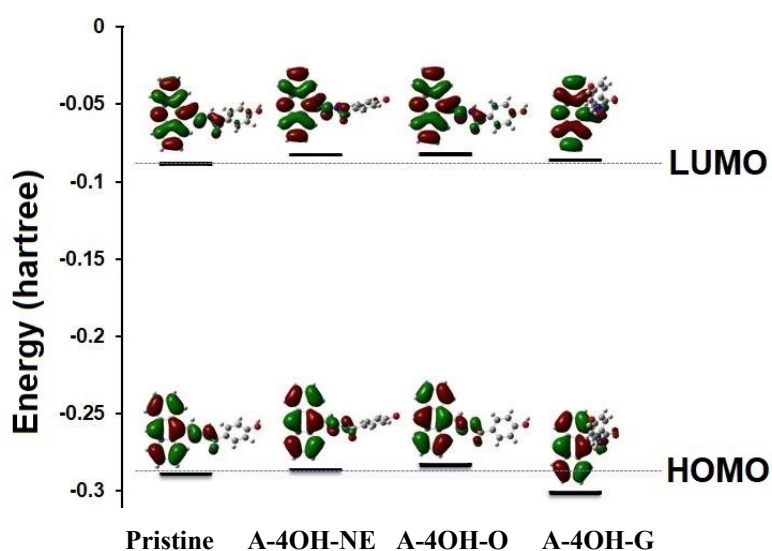

Figure S15: HOMO-LUMO energy diagram of **A-4OH**, **A-4OH-NE**, **A-4OH-O** and **A-4OH-G** as obtained from DFT calculations (using B3LYP/6-31G level of theory).

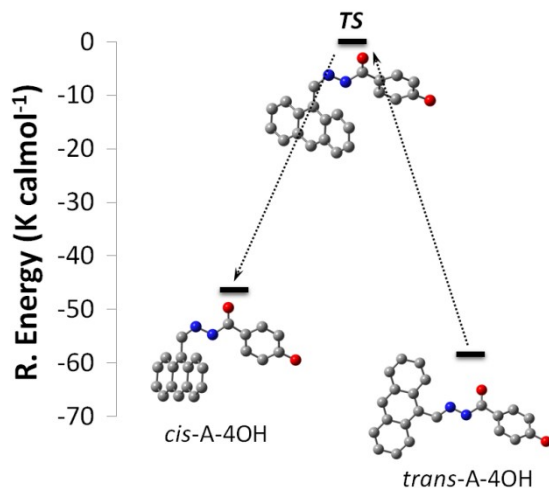

Figure S16. Calculated structures of the transition states (TS) for the photochemically induced *trans-cis* isomerisation of **A-4OH**, corresponding to an energy barrier of 62.0 kcal/mol.

**Table S2.** Crystallographic data and refinement parameters of **A-4OH-NE**, **A-4OH-O** and **A-4OH-G**

|                                          | <b>A-4-OH-NE</b>                                                                                                 | <b>A-4OH-O</b>                                                                            | <b>A-4OH-G</b>                                                                                                     |
|------------------------------------------|------------------------------------------------------------------------------------------------------------------|-------------------------------------------------------------------------------------------|--------------------------------------------------------------------------------------------------------------------|
| Empirical formula                        | C <sub>25</sub> H <sub>23</sub> N <sub>3</sub> O <sub>3</sub>                                                    | C <sub>22</sub> H <sub>18</sub> N <sub>2</sub> O <sub>3</sub>                             | C <sub>44</sub> H <sub>32</sub> N <sub>4</sub> O <sub>4</sub>                                                      |
| Formula weight                           | 413.48                                                                                                           | 358.38                                                                                    | 680.73                                                                                                             |
| Temperature                              | 296(2) K                                                                                                         | 296(2) K                                                                                  | 296(2) K                                                                                                           |
| Wavelength                               | 0.71073 Å                                                                                                        | 0.71073 Å                                                                                 | 0.71073 Å                                                                                                          |
| Crystal system                           | Triclinic                                                                                                        | Orthorhombic                                                                              | Triclinic                                                                                                          |
| Space group                              | <i>P</i> -1                                                                                                      | <i>Pbca</i>                                                                               | <i>P</i> -1                                                                                                        |
| Unit cell dimensions                     | a = 8.5226(3) Å,<br>b = 10.0347(4) Å,<br>c = 12.5476(5) Å,<br>α = 77.009(2)°<br>β = 81.678(2)°<br>γ = 86.510(2)° | a = 12.5066(4)Å,<br>b = 14.8096(5)Å,<br>c = 18.3306(7)Å,<br>α = 90°<br>β = 90°<br>γ = 90° | a = 11.3394(8) Å,<br>b = 11.3450(8) Å,<br>c = 14.9825(10) Å,<br>α = 77.424(5)°<br>β = 86.116(4)°<br>γ = 67.045(4)° |
| Volume                                   | 1034.17(7) Å <sup>3</sup>                                                                                        | 3395.2(2)Å <sup>3</sup>                                                                   | 1731.9(2)Å <sup>3</sup>                                                                                            |
| Z                                        | 2                                                                                                                | 8                                                                                         | 2                                                                                                                  |
| Density (calculated)                     | 1.184                                                                                                            | 1.402                                                                                     | 1.305                                                                                                              |
| Absorption coefficient                   | 0.089                                                                                                            | 0.094 mm <sup>-1</sup>                                                                    | 0.085                                                                                                              |
| F(000)                                   | 436.2039                                                                                                         | 1504                                                                                      | 712                                                                                                                |
| Theta range for data collection          | 2.95 to 29.08°                                                                                                   | 2.404to 29.082°                                                                           | 1.393° to 26.596°                                                                                                  |
| Index ranges                             | -11<=h<=11,<br>-13<=k<=13,<br>-17<=l<=17                                                                         | -17<=h<=11,<br>-20<=k<=20,<br>-25<=l<=21                                                  | -14<=h<=14,<br>-14<=k<=14,<br>-18<=l<=17                                                                           |
| Reflections collected                    | 20541                                                                                                            | 18823                                                                                     | 27578                                                                                                              |
| Independent reflections                  | [R(int) =]                                                                                                       | [R(int) =]                                                                                | [R(int) =]                                                                                                         |
| Completeness to theta 25.242°            | 25.242°                                                                                                          | 25.242°                                                                                   | 25.242°                                                                                                            |
| Refinement method                        | Full-matrix least-squares on <i>F</i> <sup>2</sup>                                                               | Full-matrix least-squares on <i>F</i> <sup>2</sup>                                        | Full-matrix least-squares on <i>F</i> <sup>2</sup>                                                                 |
| Data / restraints / parameters           | 5514 / 0 / 283                                                                                                   | 4469 / 0 / 273                                                                            | 7160 / 0 / 486                                                                                                     |
| Goodness-of-fit on <i>F</i> <sup>2</sup> | 1.0544                                                                                                           | 1.063                                                                                     | 1.061                                                                                                              |
| Final R indices [I>2σ(I)]                | R1 =0.0508, wR2 = 0.1411                                                                                         | R1 =0.0466, wR2 = 0.1152                                                                  | R1 =0.0723, wR2 =0.1724                                                                                            |
| R indices (all data)                     | R1 =0.0708, wR2 = 0.1589                                                                                         | R1 =0.0678, wR2 =0.1278                                                                   | R1 =0.1413, wR2 =0.2116                                                                                            |
| Largest diff. peak and hole              | e.Å <sup>-3</sup>                                                                                                | e.Å <sup>-3</sup>                                                                         | e.Å <sup>-3</sup>                                                                                                  |
